# Supplementary material for: Dendritic Cell Subpopulations Are Associated with Prognostic Characteristics of Breast Cancer after Neoadjuvant Chemotherapy—An Observational Study
Source: MDPI journal article supplement (doi:10.3390/ijms242115817), 2023-10-31
Supplement: s1 [file s1]

**Table S1.** Detailed list of the drugs used for neoadjuvant chemotherapy. Data are presented as absolute and relative frequencies: N (%).

| Drug             | N (%)     |
|------------------|-----------|
| Paclitaxel       | 45 (40%)  |
| Docetaxel        | 66 (58%)  |
| Carboplatin      | 29 (25%)  |
| Doxorubicin      | 101 (89%) |
| Epirubicin       | 4 (4%)    |
| Cyclophosphamide | 101 (89%) |
| Trastuzumab      | 38 (33%)  |
| Pertuzumab       | 17 (15%)  |

**Table S2.** Comparison between non-dichotomous characteristics and superficial dendritic cell markers (per 1 mm<sup>2</sup>). All the comparison were performed with Kruskal-Wallis test due to the nonnormal distribution of the data. Values are shown as median [range] with the p/p<sup>BH</sup> values.

| Characteristic       |                | CD123 <sup>+</sup> | p/p <sup>BH</sup> -Value | CD1a <sup>+</sup> | p/p <sup>BH</sup> -Value | DC-LAMP <sup>+</sup> | p/p <sup>BH</sup> -Value | DC-SIGN <sup>+</sup> | p/p <sup>BH</sup> -Value |
|----------------------|----------------|--------------------|--------------------------|-------------------|--------------------------|----------------------|--------------------------|----------------------|--------------------------|
|                      | cT1-2          | 6 [0-227]          | 0.4/-                    | 5 [0-42]          | 0.5/-                    | 4 [0-46]             | 0.5/-                    | 37.5 [0-163]         | 0.8/-                    |
|                      | cT3-4          | 6.5 [0-140]        |                          | 6 [0-34]          |                          | 4 [0-30]             |                          | 41 [0-188]           |                          |
|                      | cN0            | 5 [0-118]          | 0.032/0.07               | 4.5 [0-34]        | 0.9/-                    | 4 [0-46]             | 0.4/-                    | 29 [0-188]           | 0.08/-                   |
|                      | cN1-3          | 7 [0-227]          |                          | 5 [0-42]          |                          | 5 [0-34]             |                          | 42 [0-163]           |                          |
|                      | premenopausal  | 7 [0-140]          | 0.6/-                    | 6 [0-33]          | 0.3/-                    | 4.5 [0-46]           | 0.9/-                    | 36 [0-163]           | 0.5/-                    |
|                      | postmenopausal | 6 [0-227]          |                          | 5 [0-42]          |                          | 4 [0-34]             |                          | 42 [0-188]           |                          |
| anthracyclines       | no             | 7 [1-99]           | 0.5/-                    | 3 [0-11]          | 0.5/-                    | 1 [0-20]             | 0.1/-                    | 36 [9-188]           | 0.7/-                    |
|                      | yes            | 6 [0-227]          |                          | 5.5 [0-42]        |                          | 4 [0-46]             |                          | 39 [0-163]           |                          |
| taxanes              | no             | 17 [0-129]         | 0.4/-                    | 3 [0-9]           | 0.2/-                    | 7 [0-34]             | 0.1/-                    | 59 [28-91]           | 0.1/-                    |
|                      | yes            | 6 [0-227]          |                          | 5.5 [0-42]        |                          | 4 [0-46]             |                          | 37 [0-188]           |                          |
| platinum derivatives | no             | 6 [0-185]          | 1.0/-                    | 5 [0-33]          | 0.5/-                    | 3 [0-46]             | 0.08/-                   | 41 [0-163]           | 0.2/-                    |
|                      | yes            | 6 [1-227]          |                          | 6 [0-42]          |                          | 5 [0-34]             |                          | 27 [1-188]           |                          |
| cyclophosphamide     | no             | 9 [1-140]          | 0.3/-                    | 4 [0-11]          | 0.2/-                    | 2 [0-17]             | 0.5/-                    | 42 [9-188]           | 0.09/-                   |
|                      | yes            | 6 [0-227]          |                          | 6 [0-42]          |                          | 4 [0-46]             |                          | 37 [0-163]           |                          |
|                      | HER2-negative  | 8 [0-227]          | <b>0.004/0.022</b>       | 6 [0-42]          | 0.3/-                    | 4 [0-34]             | 0.8/-                    | 41 [0-188]           | 0.3/-                    |
|                      | HER2-positive  | 5 [0-140]          |                          | 5 [0-33]          |                          | 4 [0-46]             |                          | 33 [0-163]           |                          |
|                      | ypT0-is        | 5 [0-19]           | <b>0.0002/0.0022</b>     | 5 [0-33]          | 0.6/-                    | 5.5 [0-46]           | <b>0.003/0.03</b>        | 28 [0-163]           | 0.04/-                   |
|                      | ypT1-4         | 9 [0-227]          |                          | 5.5 [0-42]        |                          | 3 [0-34]             |                          | 43.5 [0-188]         |                          |
|                      | ypN0           | 5 [0-118]          | <b>0.008/0.03</b>        | 5 [0-34]          | 0.8/-                    | 4.5 [0-46]           | 1.0/-                    | 29.5 [0-188]         | 0.009/0.1                |
|                      | ypN1-3         | 9 [0-227]          |                          | 5 [0-42]          |                          | 3 [0-34]             |                          | 48 [0-141]           |                          |
| vascular invasion    | no             | 5 [0-227]          | <b>0.014/0.04</b>        | 6 [0-42]          | 0.5/-                    | 5 [0-46]             | 0.2/-                    | 29.5 [0-188]         | 0.08/-                   |
|                      | yes            | 9 [0-185]          |                          | 5 [0-23]          |                          | 3 [0-34]             |                          | 46 [0-141]           |                          |

**Abbreviations:** CD1a—cluster of differentiation 1a, CD123—cluster of differentiation 123, DC-LAMP—dendritic-cell-lysosome-associated membrane glycoprotein, DC-SIGN—dendritic-cell-specific intercellular-adhesion-molecule-3-grabbing non-integrin, HER2—human epidermal growth factor receptor 2, p/pBH—p-value and p-value after Benjamini-Hochberg correction (respectively).
